# Supplementary material
Source: PubMed Central journal article supplement (PMC2821726)
Supplement: tjp0588-0315-SD1.pdf [file tjp0588-0315-SD1.pdf]

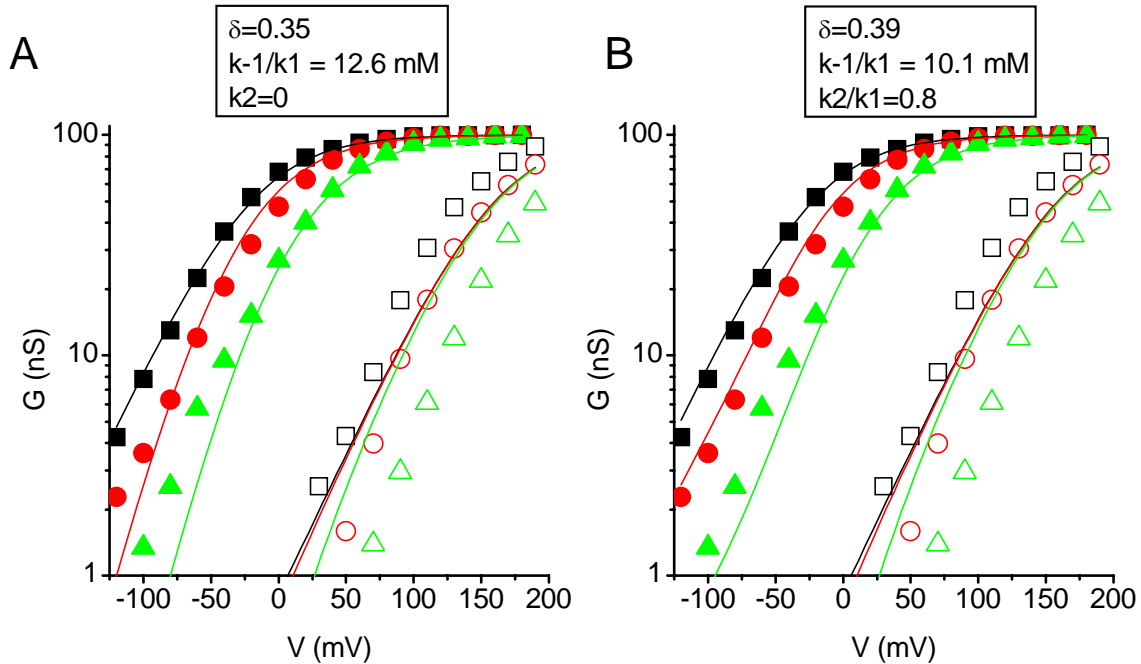

**Supplementary Figure 1.** Shown are activation curves obtained in the absence (open symbols) and presence of 100  $\mu\text{M}$  menthol (filled symbols), and with 0 mM (black squares), 2 mM (red circles) or 20 mM (green triangles) extracellular  $\text{Ca}^{2+}$  (data reproduced from Fig. 2D). We investigated the possibility that  $\text{Ca}^{2+}$  inhibits the channel in a voltage-dependent manner, by binding to a site at a distance  $\delta$  in the electrical field. The probability that the channel pore is in the unblocked block state is given by:

$$P_{\text{unblock}} = \frac{1}{1 + \frac{[\text{Ca}^{2+}]_e k_1}{k_{-1} + k_2}},$$

where  $k_1$  and  $k_{-1}$  represent the rates of  $\text{Ca}^{2+}$  binding from and  $\text{Ca}^{2+}$  unbinding to the extracellular solution, whereas  $k_2$  is the rate of  $\text{Ca}^{2+}$  unbinding towards the intracellular solution. It is assumed that the  $\text{Ca}^{2+}$  concentration of the intracellular solution is 0. The voltage dependence of the three rate constants is given by:

$$k_1 = k_{10} e^{\frac{-z\delta FV}{2RT}}$$

$$k_{-1} = k_{-10} e^{\frac{z\delta FV}{2RT}}$$

$$k_2 = k_{20} e^{\frac{-z(1-\delta)FV}{2RT}}$$

where  $k_{10}$ ,  $k_{-10}$ ,  $k_{20}$  represent the rates at 0 mV,  $z$  the valence of the blocking ion (i.e. +2 in the case of  $\text{Ca}^{2+}$ ),  $F$  the Faraday constant,  $R$  the gas constant and  $T$  the absolute temperature. Activation curves were fitted by the product of a Boltzmann function and the above function for  $P_{\text{unblock}}$ :

$$G(V) = \frac{G_{\text{max}}}{1 + \exp\left(-\frac{(V - V_{1/2})}{s}\right)} \times \frac{1}{1 + \frac{[\text{Ca}^{2+}]_e k_1}{k_{-1} + k_2}},$$

Panels (A) and (B) represent the best global fit to the data, where in (A) we assumed that  $\text{Ca}^{2+}$  ions do not pass the channel (i.e.  $k_2 = 0$ ), whereas in (B)  $\text{Ca}^{2+}$  permeation was allowed.  $V_{1/2}$  was assumed to be independent of  $\text{Ca}^{2+}$ , but sensitive to menthol. Clearly, the fits deviate largely from the experimental data.
